# Supplementary material for: Self-assembled supramolecular structure of N,N,N′,N′-tetramethylethylenediammonium-bis-(4-nitrophenolate): synthesis, single crystal growth and photo physical properties
Source: Royal Society of Chemistry journal article supplement (doi:10.1039/c4ra02393e), 2014-01-01
Supplement: c4ra02393e1.pdf [file c4ra02393e1.pdf]

## Electronic Supplementary Information (ESI)

### **Self- assembled supramolecular structure of N,N,N',N'- tetramethylethylenediammonium-bis-(4-nitrophenolate):synthesis, single crystal growth and photo physical properties**

**P. Nagapandiselvi<sup>a</sup>, C. Baby<sup>b</sup> and R. Gopalakrishnan<sup>a\*</sup>**

*<sup>a</sup>Crystal Research Lab, Department of Physics, Anna University, Chennai, India.*

*<sup>b</sup>Sophisticated Analytical Instrument Facility, Indian Institute of Technology Madras, Chennai, India.*

Email.: krgkrishnan@annauniv.edu, [krgkrishnan@yahoo.com](mailto:krgkrishnan@yahoo.com)

## Table of Contents

|                                                                                                |    |
|------------------------------------------------------------------------------------------------|----|
| 1. Experimental procedure                                                                      | 3  |
| 2. Solubility determination of TMEDA4NP                                                        | 3  |
| 3. Some selected bond lengths and bond angles of TMED4NP                                       | 4  |
| 4. Hydrogen bonds for TMEDA4NP                                                                 | 4  |
| 5. View of hydrogen bonded network forming ring                                                | 5  |
| 6. FT IR Spectrum of TMEDA4NP                                                                  | 6  |
| 7. 500 MHz $^1\text{H}$ NMR spectrum of TMEDA4NP in $\text{CD}_3\text{CN}$ at Room Temperature | 7  |
| 8. $^{13}\text{C}$ NMR spectrum of TMEDA4NP in $\text{CD}_3\text{CN}$ at Room Temperature      | 8  |
| 9. DEPT-135 NMR spectrum of TMEDA4NP in $\text{CD}_3\text{CN}$ at Room Temperature             | 9  |
| 10. COSY Spectrum of TMEDA4NP in $\text{CD}_3\text{CN}$ at Room Temperature                    | 10 |
| 11. HSQC spectrum of TMEDA4NP showing the one bond $^1\text{H}$ - $^{13}\text{C}$ correlation  | 11 |

## 1. Experimental procedure

### 1.1 Solubility determination of TMEDA4NP

25 ml of acetonitrile was taken in a pre-weighed clean beaker and kept in constant temperature bath (25°C, ± 0.01°C) with an immersible magnetic stirrer facility. The powdered TMEDA4NP was added slowly to the solvent and stirred well until the saturation ceases. The beaker was taken out and weighed again. The weight of the solution was assessed by taking the difference between the empty beaker and the beaker containing the saturated solution. The solution was then allowed to evaporate and the amount of the solute was determined. The solubility of the material was estimated using the formula

$$\text{Solubility (wt\%)} = \frac{\text{Weight of the solute}}{\text{Weight of (solute + solvent)}} \times 100$$

The above procedure was repeated for five different temperatures (30, 35, 40, 45 and 50°C) and also for determining the solubility of TMEDA4NP in methanol.

**Table S1** Bond lengths [Å] and angles [°] for TMEDA4NP

|                         |            |                              |            |
|-------------------------|------------|------------------------------|------------|
| C(1)-C(2)               | 1.378(2)   | C(2)-C(1)-C(6)               | 120.85(12) |
| C(1)-C(6)               | 1.379(2)   | C(2)-C(1)-N(1)               | 119.44(14) |
| C(1)-N(1)               | 1.4389(17) | C(6)-C(1)-N(1)               | 119.71(13) |
| C(2)-C(3)               | 1.3736(19) | C(3)-C(2)-C(1)               | 119.55(13) |
| C(3)-C(4)               | 1.399(2)   | C(2)-C(3)-C(4)               | 121.19(12) |
| C(4)-O(3)               | 1.3090(15) | O(3)-C(4)-C(3)               | 122.57(12) |
| C(4)-C(5)               | 1.4026(19) | O(3)-C(4)-C(5)               | 119.91(12) |
| C(5)-C(6)               | 1.3695(19) | C(3)-C(4)-C(5)               | 117.52(12) |
| C(7)-N(2)               | 1.4698(18) | C(6)-C(5)-C(4)               | 121.33(13) |
| C(8)-N(2)               | 1.4811(16) | C(5)-C(6)-C(1)               | 119.52(13) |
| C(8)-C(8) <sup>#1</sup> | 1.512(2)   | N(2)-C(8)-C(8) <sup>#1</sup> | 110.98(12) |
| C(9)-N(2)               | 1.4788(17) | O(1)-N(1)-O(2)               | 122.26(14) |
| N(1)-O(1)               | 1.222(2)   | O(1)-N(1)-C(1)               | 118.54(14) |
| N(1)-O(2)               | 1.2242(19) | O(2)-N(1)-C(1)               | 119.20(15) |
|                         |            | C(7)-N(2)-C(9)               | 109.61(11) |
|                         |            | C(7)-N(2)-C(8)               | 113.18(11) |
|                         |            | C(9)-N(2)-C(8)               | 108.97(10) |

Symmetry transformations used to generate equivalent atoms: #1 -x+2,-y,-z+2

**Table S2** Hydrogen bonds for TMEDA4NP [Å and °]

| D-H...A             | d(D-H)   | d(H...A)  | d(D...A)   | <(DHA) |
|---------------------|----------|-----------|------------|--------|
| N(2)-H(2A)...O(3)#2 | 0.953(9) | 1.614(10) | 2.5592(17) | 170(2) |

Symmetry transformations used to generate equivalent atoms:

#1 -x+2,-y,-z+2 #2 -x+3/2,y-1/2,-z+3/2

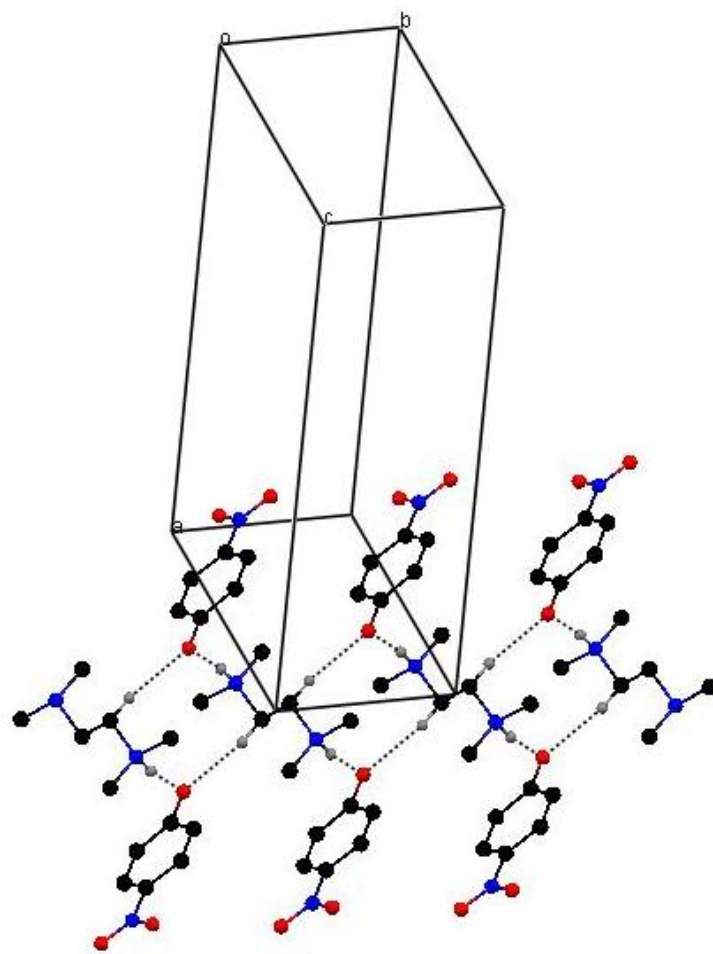

**Fig. S1** View of hydrogen bonded network forming ring

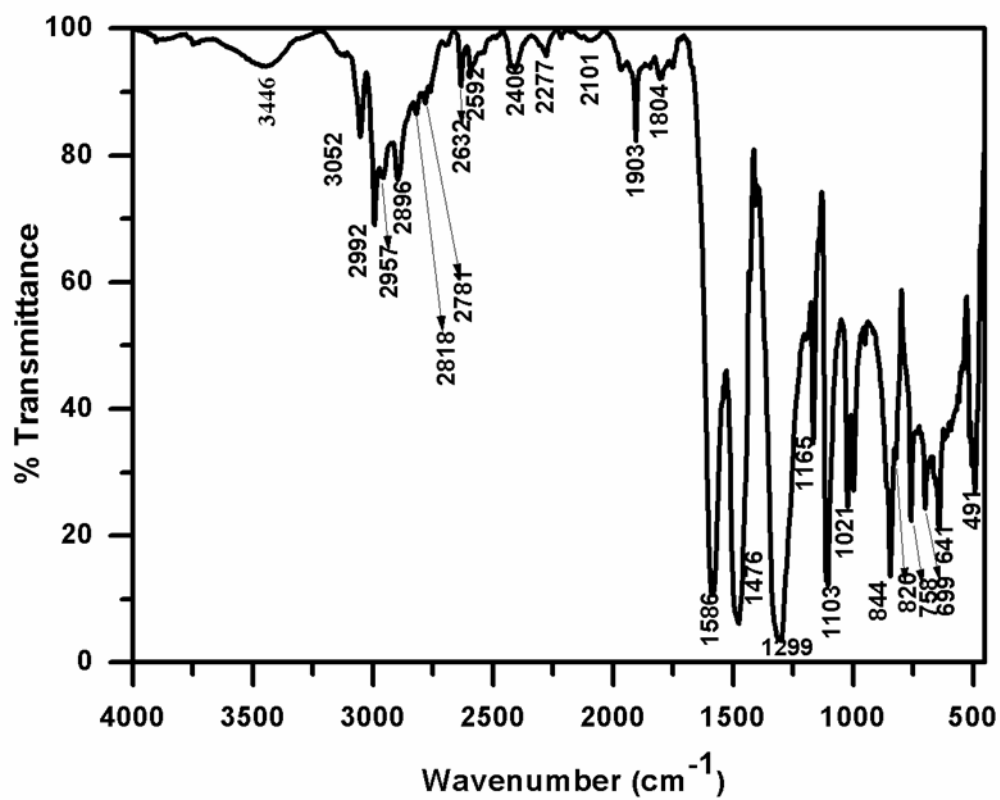

Fig. S2 FT IR Spectrum of TMEDA4NP

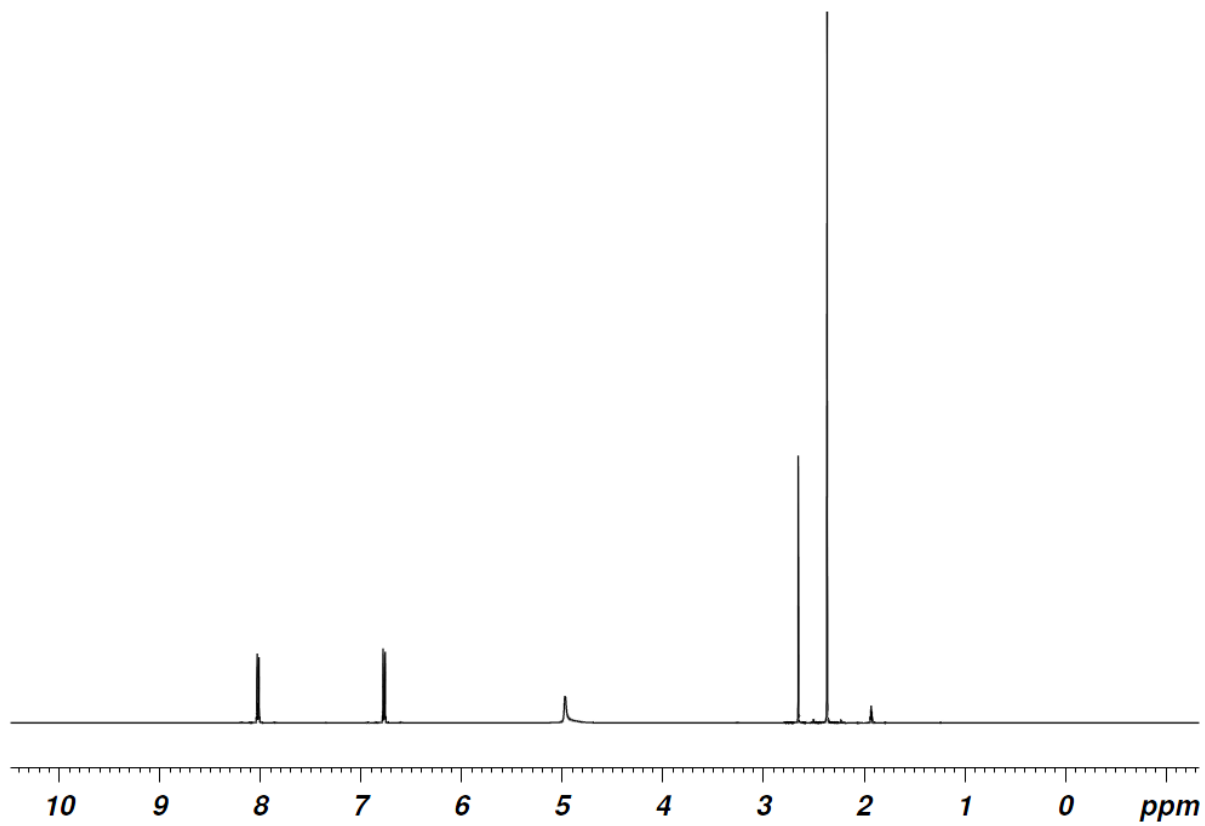

**Fig. S3** 500 MHz  $^1\text{H}$  NMR spectrum of TMEDA4NP in  $\text{CD}_3\text{CN}$  at Room Temperature

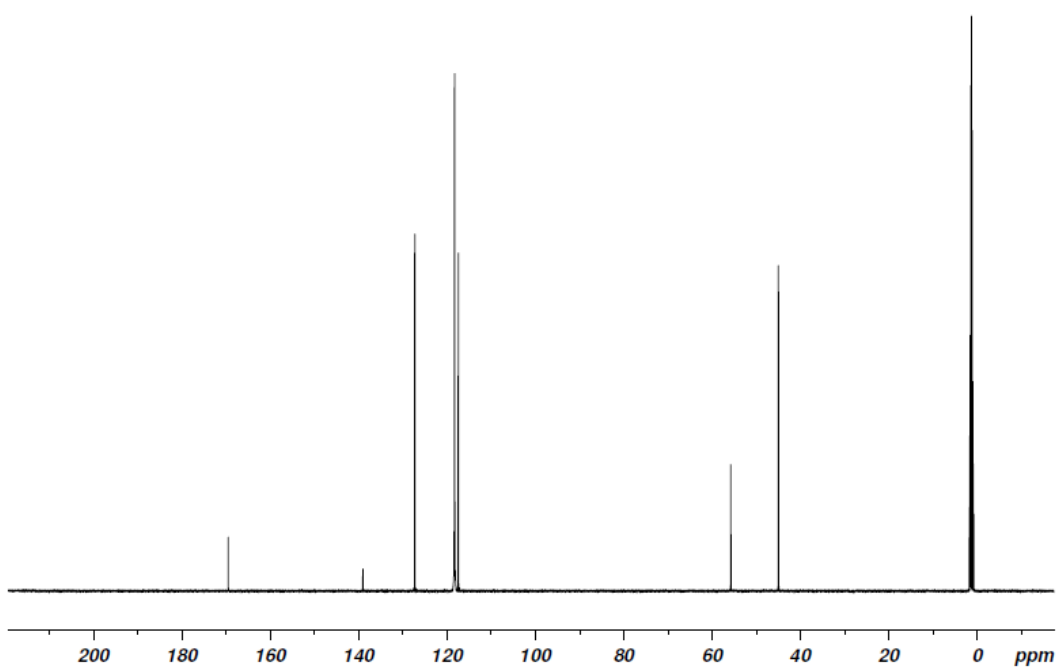

**Fig. S4**  $^{13}\text{C}$  NMR spectrum of TMEDA4NP in  $\text{CD}_3\text{CN}$  at Room Temperature



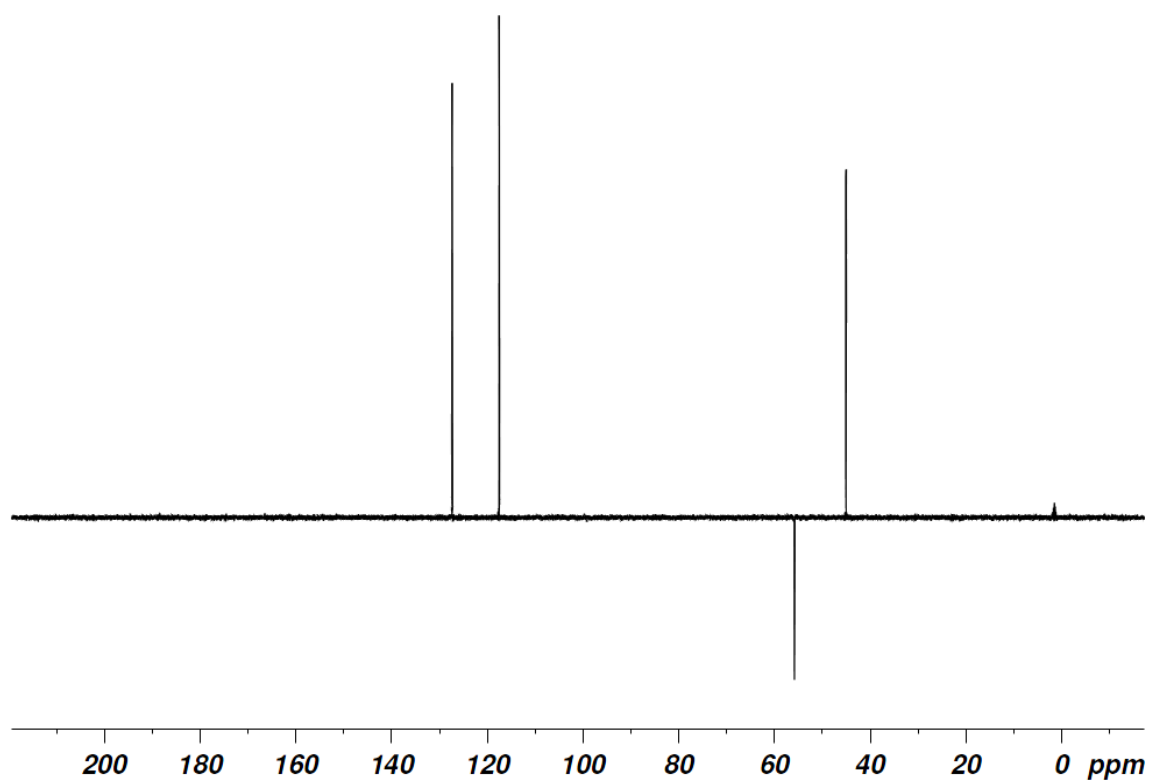

**Fig. S5** DEPT-135 NMR spectrum of TMEDA4NP in CD<sub>3</sub>CN at Room Temperature

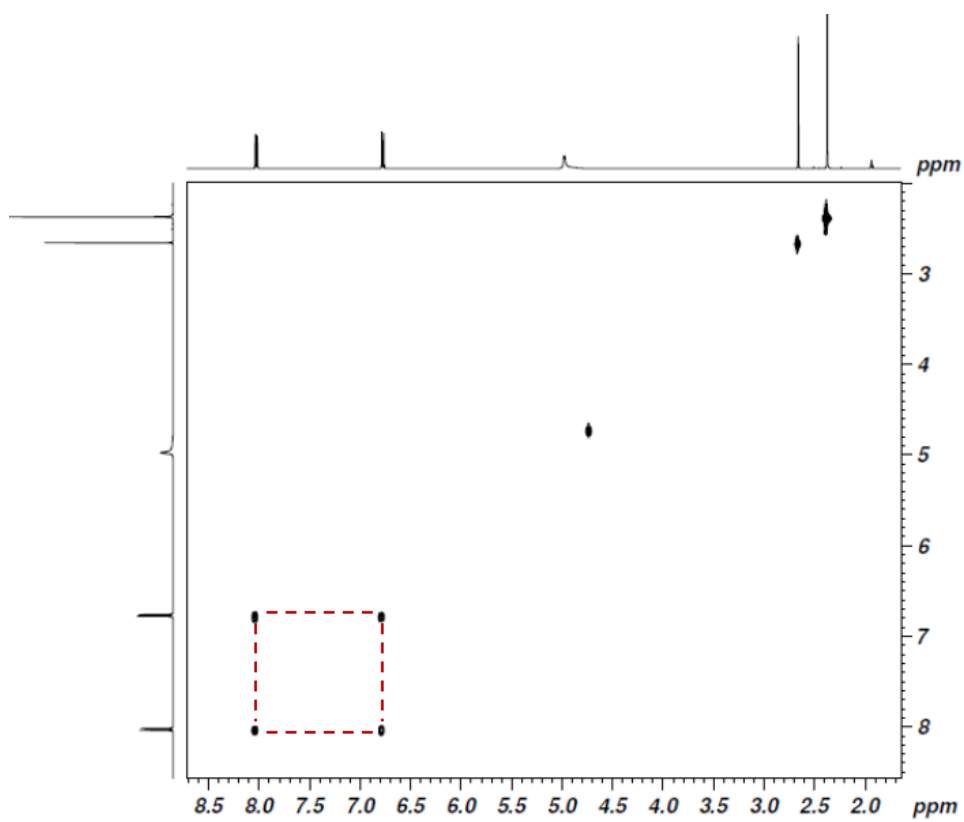

**Fig. S6** COSY Spectrum of TMEDA4NP in CD<sub>3</sub>CN

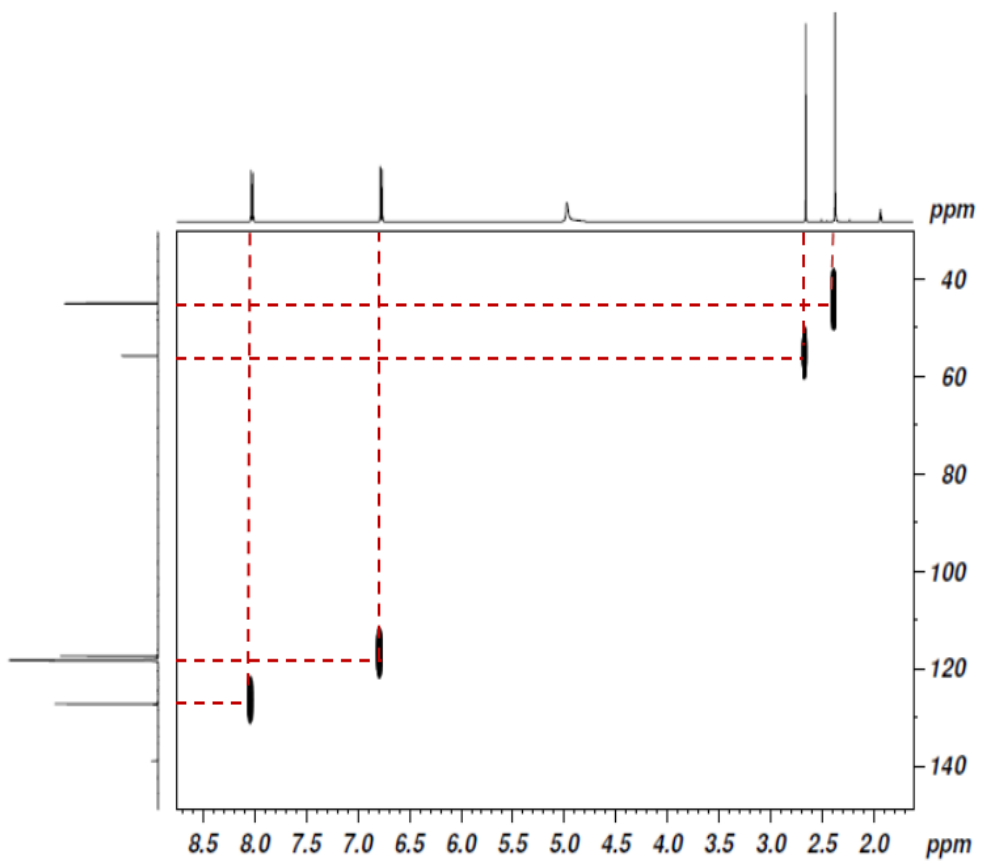

**Fig. S7** HSQC spectrum of TMEDA4NP showing the one bond  $^1\text{H}$ - $^{13}\text{C}$  correlation
